# Supplementary material for: Plasma Amino Acids in NAFLD Patients with Obesity Are Associated with Steatosis and Fibrosis: Results from the MAST4HEALTH Study
Source: MDPI journal article supplement (doi:10.3390/metabo13080959), 2023-08-18
Supplement: s1 [file s1]

**Table S1: Correlation analysis between Amino Acid Concentrations and MRI parameters, inflammation and oxidative stress biomarkers, biochemical parameters and anthropometrics.** *Pearson's correlation coefficient for normally distributed variables and Spearman's rank correlation for non-normally distributed variables. Note: \*normally distributed variable. Correlation coefficient values are given. Yellow color indicates a statistically significant result of correlation analysis. \*  $P \leq 0.05$ , \*\*  $P \leq 0.01$ , \*\*\*  $P \leq 0.001$ .*

| Amino Acids (AAs)                           | MRI parameters |       |          |                               |
|---------------------------------------------|----------------|-------|----------|-------------------------------|
|                                             | cT1 (ms)       | LIF   | PDFF (%) | iron ROI pooled median (mg/g) |
| Essential AAs                               | 0.28           | 0.29  | 0.38     | 0.27                          |
| Nonessential AAs                            | 0.16           | 0.10  | 0.13     | 0.11                          |
| GSG index ( glutamate / (serine + glycine)) | 0.20           | 0.27  | 0.32     | 0.16                          |
| BCAAs (Valine + Leucine + Isoleucine)       | 0.21           | 0.23  | 0.38     | 0.28                          |
| AAAs (Tyrosine + Phenylalanine)             | 0.25           | 0.25  | 0.44 **  | 0.32                          |
| L-Alanine*                                  | 0.25           | 0.23  | 0.16     | 0.02                          |
| beta-Alanine*                               | -4.56e-03      | 0.08  | 0.10     | 0.23                          |
| Sarcosine                                   | 0.11           | 0.18  | 0.07     | -0.06                         |
| Cystine                                     | 0.02           | 0.05  | -0.03    | -0.18                         |
| L-Serine                                    | -0.11          | -0.15 | -0.05    | 0.12                          |

|                                      |           |           |       |           |
|--------------------------------------|-----------|-----------|-------|-----------|
| <b>O-Phosphoethanolamine</b>         | 0.07      | 0.12      | -0.04 | -0.33     |
| <b>Taurine</b>                       | 0.10      | 0.16      | -0.02 | -0.11     |
| <b>L-Asparagine</b>                  | 0.14      | 0.07      | 0.09  | 0.10      |
| <b>Hydroxy-L-Proline</b>             | 0.08      | 0.03      | 0.14  | 0.22      |
| <b>Glycine</b>                       | -0.13     | -0.16     | -0.27 | -0.12     |
| <b>L-Glutamine*</b>                  | -8.56e-03 | -0.06     | 0.02  | 0.13      |
| <b>Ethanolamine*</b>                 | 9.20e-03  | -8.10e-03 | 0.03  | 0.19      |
| <b>L-Aspartic acid</b>               | 0.24      | 0.27      | 0.25  | 0.13      |
| <b>L-Citruline</b>                   | -0.04     | -0.08     | -0.09 | 0.02      |
| <b>L-Threonine</b>                   | 0.27      | 0.25      | 0.10  | -0.05     |
| <b>L-Glutamic acid</b>               | 0.28      | 0.35      | 0.35  | 0.16      |
| <b>L-Histidine*</b>                  | -0.05     | 0.01      | 0.02  | -8.34e-04 |
| <b>1-Me-L-Histidine</b>              | 0.12      | 0.14      | 0.12  | 0.08      |
| <b>3-Me-L-Histidine</b>              | 0.06      | 0.05      | 0.16  | 0.26      |
| <b>gamma-Amino-butyric acid GABA</b> | 0.02      | 0.02      | -0.05 | -0.11     |

|                                       |           |       |         |           |
|---------------------------------------|-----------|-------|---------|-----------|
| <b>D,L-beta-Aminoisobutyric acid</b>  | -0.17     | -0.18 | -0.29   | -2.49e-03 |
| <b>D,L-alpha-Amino-n-butyric acid</b> | -0.03     | -0.04 | 0.08    | 0.09      |
| <b>L-alpha-Aminoadipic acid</b>       | 0.06      | 0.10  | 0.29    | 0.17      |
| <b>L-Proline</b>                      | 0.15      | 0.13  | 0.19    | 0.12      |
| <b>L-Arginine*</b>                    | -3.45e-03 | 0.03  | -0.01   | -0.16     |
| <b>L-Orthithine</b>                   | 0.10      | 0.04  | 0.12    | 0.26      |
| <b>L-Lysine</b>                       | 0.28      | 0.23  | 0.24    | 0.33      |
| <b>L-Valine</b>                       | 0.23      | 0.27  | 0.37    | 0.24      |
| <b>L-Methionine*</b>                  | 0.12      | 0.09  | 0.22    | 0.11      |
| <b>L-Tyrosine</b>                     | 0.26      | 0.24  | 0.44 ** | 0.32      |
| <b>L-Isoleucine</b>                   | 0.17      | 0.16  | 0.42 *  | 0.33      |
| <b>L-Leucine</b>                      | 0.14      | 0.14  | 0.33    | 0.28      |
| <b>L-Phenylalanine</b>                | 0.23      | 0.25  | 0.38    | 0.27      |
| <b>L-Tryptophan</b>                   | 0.12      | 0.10  | 0.25    | 0.27      |

*cT1: included iron-corrected; LIF: liver inflammation fibrosis score; PDFF: proton density fat fraction; iron ROI pooled median: iron region of interest pooled median*

| Amino Acids (AAs)                          | Inflammation and oxidative stress biomarkers |               |               |                  |                  |                 |                 |                 |                 |                  |                |
|--------------------------------------------|----------------------------------------------|---------------|---------------|------------------|------------------|-----------------|-----------------|-----------------|-----------------|------------------|----------------|
|                                            | EGF<br>(pg/mL)                               | Glut<br>(U/L) | HGB<br>(g/mL) | IL-1a<br>(pg/mL) | IL-1b<br>(pg/mL) | IL-2<br>(pg/mL) | IL-4<br>(pg/mL) | IL-6<br>(pg/mL) | IL-8<br>(pg/mL) | IL-10<br>(pg/mL) | IFN<br>(pg/mL) |
| Essential AAs                              | 0.04                                         | 0.29          | 0.32          | 0.10             | -7.71e-04        | -0.09           | 0.04            | 0.22            | 0.12            | 0.03             | -0.02          |
| Nonessential AAs                           | 0.05                                         | 0.24          | 0.11          | 0.10             | -0.05            | 0.04            | -6.42e-03       | -0.02           | 0.20            | 0.10             | 4.36e-03       |
| GSG index (glutamate / (serine + glycine)) | -0.21                                        | 0.03          | 0.13          | 0.02             | -0.02            | -0.09           | 0.09            | 0.08            | 0.07            | -0.05            | -0.24          |
| BCAAs (Valine + Leucine + Isoleucine)      | -0.05                                        | 0.35          | 0.33          | 0.07             | -0.02            | -0.13           | 0.05            | 0.24            | 0.09            | 0.05             | 0.01           |
| AAAs (Tyrosine + Phenylalanine)            | 0.15                                         | 0.19          | 0.22          | 0.08             | 0.14             | -0.03           | 0.19            | 0.19            | 0.16            | 0.16             | -0.06          |
| L-Alanine*                                 | 5.76e-03                                     | 0.07          | -0.06         | 0.10             | 0.16             | 6.80e-05        | 0.09            | -0.08           | 0.06            | 0.19             | 0.18           |

|                                        |       |       |        |          |          |           |       |           |       |       |          |
|----------------------------------------|-------|-------|--------|----------|----------|-----------|-------|-----------|-------|-------|----------|
| <b>beta-Alanine*</b>                   | -0.19 | 0.14  | 0.14   | 0.02     | 8.12e-03 | -0.21     | -0.08 | 0.12      | -0.04 | 0.05  | 0.03     |
| <b>Sarcosine</b>                       | -0.15 | 0.06  | 0.14   | 1.86e-04 | -0.17    | -0.13     | 0.03  | 0.28      | 0.11  | 0.10  | -0.12    |
| <b>Cystine</b>                         | 0.04  | 0.14  | 0.07   | 0.07     | -0.14    | 0.09      | 0.04  | -0.05     | -0.11 | -0.19 | -0.13    |
| <b>L-Serine</b>                        | 0.15  | 0.06  | 0.05   | -0.02    | -0.10    | 0.04      | -0.07 | 0.06      | 0.06  | 0.17  | 0.02     |
| <b>O-<br/>Phosphoethanolamin<br/>e</b> | 0.03  | -0.05 | 0.05   | -0.14    | -0.12    | -0.10     | -0.09 | -3.95e-03 | -0.16 | -0.07 | -0.07    |
| <b>Taurine</b>                         | -0.05 | 0.18  | 0.11   | -0.09    | -0.09    | -1.67e-03 | 0.04  | 0.10      | -0.07 | -0.19 | -0.37    |
| <b>L-Asparagine</b>                    | 0.28  | 0.04  | 0.03   | 0.11     | 0.11     | 0.10      | -0.08 | 0.02      | 0.12  | 0.17  | 0.09     |
| <b>Hydroxy-L-Proline</b>               | 0.07  | 0.03  | 0.03   | -0.10    | -0.10    | -0.19     | -0.03 | 0.28      | -0.06 | -0.01 | 1.99e-03 |
| <b>Glycine</b>                         | 0.15  | 0.02  | 0.03   | 0.03     | -0.02    | 0.10      | -0.07 | -0.10     | 0.07  | 0.21  | 0.09     |
| <b>L-Glutamine*</b>                    | -0.02 | 0.25  | 0.17   | 0.09     | -0.05    | 0.05      | -0.07 | -0.02     | 0.08  | -0.07 | 3.06e-03 |
| <b>Ethanolamine*</b>                   | 0.15  | 0.10  | 0.41 * | -0.12    | 0.05     | -1.86e-03 | -0.04 | 0.06      | -0.05 | 0.10  | -0.02    |
| <b>L-Aspartic acid</b>                 | -0.09 | 0.05  | 0.16   | -0.15    | 0.02     | -0.17     | -0.05 | 0.21      | 0.03  | 0.03  | -0.24    |
| <b>L-Citruline</b>                     | 0.21  | 0.09  | 0.03   | -0.15    | -0.08    | -0.09     | -0.27 | 0.15      | 0.06  | 0.04  | -0.06    |

|                                       |           |       |           |           |       |       |       |          |          |       |       |
|---------------------------------------|-----------|-------|-----------|-----------|-------|-------|-------|----------|----------|-------|-------|
| <b>L-Threonine</b>                    | 0.06      | 0.18  | 0.09      | 3.30e-03  | -0.15 | -0.09 | -0.05 | 0.07     | 0.05     | -0.18 | -0.24 |
| <b>L-Glutamic acid</b>                | -0.21     | 0.03  | 0.22      | 0.03      | -0.06 | -0.10 | 0.08  | 0.16     | 0.17     | 0.05  | -0.22 |
| <b>L-Histidine*</b>                   | 0.04      | 0.16  | -8.10e-03 | 0.09      | 0.06  | -0.03 | -0.06 | 0.04     | -0.08    | -0.03 | -0.03 |
| <b>1-Me-L-Histidine</b>               | -6.92e-03 | 0.07  | 0.18      | 0.10      | -0.05 | -0.01 | 0.03  | 0.10     | 5.98e-03 | 0.07  | 0.04  |
| <b>3-Me-L-Histidine</b>               | -0.07     | 0.13  | 0.22      | -0.01     | -0.12 | -0.15 | -0.09 | 0.20     | -0.09    | -0.11 | 0.06  |
| <b>gamma-Amino-butyrac acid GABA</b>  | 0.01      | -0.17 | 0.09      | -0.11     | -0.02 | -0.08 | -0.03 | 0.02     | -0.01    | -0.09 | -0.05 |
| <b>D,L-beta-Aminoisobutyric acid</b>  | 0.10      | 0.11  | 0.16      | -0.14     | -0.18 | -0.19 | -0.08 | 0.11     | -0.05    | 0.07  | -0.10 |
| <b>D,L-alpha-Amino-n-butyric acid</b> | -0.05     | -0.10 | 0.13      | -0.07     | -0.09 | 0.08  | -0.12 | 0.03     | -0.05    | -0.04 | -0.04 |
| <b>L-alpha-Aminoadipic acid</b>       | -0.09     | 0.21  | 0.21      | 3.37e-03  | 0.11  | -0.06 | 0.09  | 0.19     | 0.07     | -0.04 | -0.08 |
| <b>L-Proline</b>                      | -0.03     | 0.30  | 0.08      | 0.02      | -0.07 | -0.09 | 0.09  | 0.06     | 0.15     | 0.05  | -0.02 |
| <b>L-Arginine*</b>                    | -0.20     | 0.18  | -0.11     | -7.38e-03 | -0.04 | -0.07 | -0.10 | 8.78e-03 | 0.05     | -0.12 | -0.10 |

|                        |                 |       |      |          |           |          |           |      |          |      |       |
|------------------------|-----------------|-------|------|----------|-----------|----------|-----------|------|----------|------|-------|
| <b>L-Orthithine</b>    | 0.35<br>(0.278) | -0.04 | 0.11 | 7.68e-03 | 0.05      | -0.11    | -0.01     | 0.29 | 9.38e-03 | 0.18 | 0.05  |
| <b>L-Lysine</b>        | 4.14e-03        | 0.02  | 0.14 | 0.14     | 0.04      | 3.15e-03 | 0.12      | 0.21 | 0.12     | 0.13 | 0.08  |
| <b>L-Valine</b>        | -0.10           | 0.36  | 0.29 | 0.03     | -0.05     | -0.16    | 0.04      | 0.22 | 0.06     | 0.03 | 0.02  |
| <b>L-Methionine*</b>   | 0.23            | 0.15  | 0.09 | 0.01     | 0.09      | -0.05    | 2.42e-03  | 0.20 | -0.09    | 0.06 | -0.11 |
| <b>L-Tyrosine</b>      | 0.09            | 0.19  | 0.13 | 0.03     | 0.13      | -0.01    | 0.17      | 0.19 | 0.18     | 0.13 | -0.10 |
| <b>L-Isoleucine</b>    | 0.02            | 0.19  | 0.28 | 0.03     | -2.07e-03 | -0.10    | 0.05      | 0.26 | 0.11     | 0.02 | 0.02  |
| <b>L-Leucine</b>       | 0.05            | 0.29  | 0.34 | 0.12     | 0.04      | -0.04    | -8.70e-03 | 0.24 | 0.07     | 0.05 | 0.03  |
| <b>L-Phenylalanine</b> | 0.19            | 0.17  | 0.30 | 0.15     | 0.13      | -0.05    | 0.17      | 0.16 | 0.08     | 0.17 | 0.07  |
| <b>L-Tryptophan</b>    | 0.18            | 0.22  | 0.28 | -0.02    | 0.06      | 0.06     | 0.14      | 0.02 | 0.07     | 0.14 | -0.05 |

EGF: Epidermal Growth Factor levels; Mean (pg/mL), Glut: Glutathione activity; Mean (U/L), HGB: Hemoglobin levels; (g/mL), IL-1a: Interleukin-1a levels; Mean (pg/mL), IL-1b: Interleukin-1b levels; Mean (pg/mL), IL-2: Interleukin-2 levels; Mean (pg/mL), IL-4: Interleukin-4 levels; Mean (pg/mL), IL-6: Interleukin-6 levels; Mean (pg/mL), IL-8: Interleukin-8 levels; Mean (pg/mL), IL-10: Interleukin-10 levels; Mean (pg/mL), IFN: Interferon- $\gamma$  levels; Mean (pg/mL)

|                                                | Inflammation and oxidative stress biomarkers |            |                                        |              |             |              |
|------------------------------------------------|----------------------------------------------|------------|----------------------------------------|--------------|-------------|--------------|
| Amino Acids (AAs)                              | MCP (pg/mL)                                  | SOD (U/mL) | SOD per HGB<br>(SOD U/mL)(g<br>HGB/mL) | TAS (mmol/L) | TNF (pg/mL) | VEGF (pg/mL) |
| Essential AAs                                  | 0.15                                         | 0.07       | -0.05                                  | 0.27         | 0.16        | -0.05        |
| Nonessential AAs                               | -0.01                                        | 0.05       | -2.38e-04                              | 0.07         | 0.22        | -0.08        |
| GSG index ( glutamate /<br>(serine + glycine)) | 0.08                                         | -0.12      | -0.15                                  | 0.08         | -0.16       | -0.19        |
| BCAAs (Valine + Leucine +<br>Isoleucine)       | 0.13                                         | 0.15       | 8.50e-03                               | 0.29         | 0.12        | -0.04        |
| AAAs (Tyrosine +<br>Phenylalanine)             | 0.28                                         | 0.08       | 0.02                                   | 0.36         | 0.10        | -0.08        |
| L-Alanine*                                     | 0.16                                         | 0.10       | 0.19                                   | 0.22         | 0.08        | -0.06        |
| beta-Alanine*                                  | 0.12                                         | -0.07      | -0.11                                  | 0.19         | 9.03e-03    | -0.08        |
| Sarcosine                                      | 0.08                                         | -0.13      | -0.16                                  | 0.09         | -0.04       | -0.03        |
| Cystine                                        | -0.20                                        | -0.20      | -0.22                                  | -0.31        | 0.24        | -0.01        |
| L-Serine                                       | -0.04                                        | -0.06      | -0.11                                  | -0.04        | 0.16        | 0.02         |
| O-Phosphoethanolamine                          | 0.15                                         | -0.08      | -0.08                                  | -0.18        | -0.04       | 0.10         |
| Taurine                                        | 0.12                                         | -0.16      | -0.23                                  | -0.02        | 0.09        | -0.03        |

|                                           |          |       |       |          |           |          |
|-------------------------------------------|----------|-------|-------|----------|-----------|----------|
| <b>L-Asparagine</b>                       | 0.08     | -0.07 | -0.07 | 0.09     | 0.21      | 0.11     |
| <b>Hydroxy-L-Proline</b>                  | 8.42e-03 | 0.25  | 0.19  | 0.38     | -0.06     | 0.06     |
| <b>Glycine</b>                            | -0.11    | 0.08  | 0.08  | -0.06    | 0.22      | 0.06     |
| <b>L-Glutamine*</b>                       | -0.10    | 0.09  | 0.02  | 0.07     | 0.11      | -0.07    |
| <b>Ethanolamine*</b>                      | 0.25     | 0.23  | 0.09  | 0.43 **  | -0.03     | 0.02     |
| <b>L-Aspartic acid</b>                    | 0.24     | -0.13 | -0.18 | 0.26     | -0.09     | -0.10    |
| <b>L-Citruline</b>                        | -0.01    | 0.14  | 0.10  | 0.14     | -9.17e-04 | -0.02    |
| <b>L-Threonine</b>                        | 0.02     | -0.07 | -0.10 | -0.04    | 0.06      | 0.12     |
| <b>L-Glutamic acid</b>                    | 0.02     | -0.12 | -0.19 | 0.11     | -0.07     | -0.18    |
| <b>L-Histidine*</b>                       | 0.08     | -0.15 | -0.10 | 0.03     | 0.07      | -0.23    |
| <b>1-Me-L-Histidine</b>                   | 0.04     | 0.26  | 0.17  | 0.24     | -0.01     | 0.12     |
| <b>3-Me-L-Histidine</b>                   | 0.13     | 0.25  | 0.14  | 0.37     | 0.10      | -0.12    |
| <b>gamma-Amino-butyric acid<br/>GABA</b>  | 0.06     | -0.19 | -0.19 | 6.52e-03 | -0.07     | -0.02    |
| <b>D,L-beta-Aminoisobutyric<br/>acid</b>  | -0.08    | 0.03  | -0.02 | -0.01    | 0.11      | 0.01     |
| <b>D,L-alpha-Amino-n-butyric<br/>acid</b> | 0.04     | 0.16  | 0.12  | 0.23     | -0.08     | 5.73e-03 |
| <b>L-alpha-Aminoadipic acid</b>           | 0.19     | 0.07  | 0.04  | 0.21     | -0.12     | 9.54e-03 |
| <b>L-Proline</b>                          | -0.09    | 0.05  | 0.04  | 0.06     | 0.14      | -0.10    |
| <b>L-Arginine*</b>                        | -0.06    | -0.03 | 0.03  | -0.15    | -0.06     | -0.10    |

|                        |      |           |       |         |           |       |
|------------------------|------|-----------|-------|---------|-----------|-------|
| <b>L-Orthithine</b>    | 0.26 | 0.21      | 0.16  | 0.44 ** | 0.15      | 0.08  |
| <b>L-Lysine</b>        | 0.24 | -7.24e-03 | -0.04 | 0.26    | 0.17      | -0.05 |
| <b>L-Valine</b>        | 0.17 | 0.11      | -0.02 | 0.24    | 0.12      | -0.06 |
| <b>L-Methionine*</b>   | 0.13 | 0.22      | 0.18  | 0.31    | 0.06      | -0.01 |
| <b>L-Tyrosine</b>      | 0.26 | 0.09      | 0.05  | 0.35    | 0.03      | -0.05 |
| <b>L-Isoleucine</b>    | 0.06 | 0.12      | 0.02  | 0.33    | -1.09e-03 | 0.02  |
| <b>L-Leucine</b>       | 0.13 | 0.22      | 0.07  | 0.35    | 0.16      | -0.04 |
| <b>L-Phenylalanine</b> | 0.28 | 0.06      | -0.03 | 0.32    | 0.25      | -0.13 |
| <b>L-Tryptophan</b>    | 0.21 | 0.14      | 0.01  | 0.34    | 0.07      | -0.12 |

MCP: Monocyte Chemoattractant Protein1; Mean (pg/mL), SOD: Superoxide dismutase acivity; Mean (U/mL), SOD per HGB: Superoxide dismutase acivity per gram HGB; Mean (SOD U/mL)(g HGB/mL), TAS: Total Antioxidant Status; Mean (mmol/L), TNF: Tumour Necrosis Factor; Mean (pg/mL), VEGF: Vascular Endothelial Growth Factor; Mean (pg/mL)

|                   | Biochemical parameters |            |               |                           |             |             |                       |
|-------------------|------------------------|------------|---------------|---------------------------|-------------|-------------|-----------------------|
| Amino Acids (AAs) | ALT (IU/L)             | AST (IU/L) | AST/ALT ratio | Total cholesterol (mg/dL) | LDL (mg/dL) | HDL (mg/dL) | Triglycerides (mg/dl) |
| Essential AAs     | 0.33                   | 0.23       | -0.28         | -0.11                     | -0.08       | -0.23       | 0.19                  |
| Nonessential AAs  | 0.22                   | 0.18       | -0.20         | -0.03                     | -6.69e-03   | -0.04       | -0.05                 |

|                                                        |          |          |       |       |       |       |          |
|--------------------------------------------------------|----------|----------|-------|-------|-------|-------|----------|
| <b>GSG index ( glutamate /<br/>(serine + glycine))</b> | 0.14     | 0.07     | -0.12 | -0.18 | -0.21 | -0.19 | 0.30     |
| <b>BCAAs (Valine +<br/>Leucine + Isoleucine)</b>       | 0.30     | 0.13     | -0.36 | -0.05 | -0.08 | -0.23 | 0.30     |
| <b>AAAs (Tyrosine +<br/>Phenylalanine)</b>             | 0.43 *   | 0.32     | -0.33 | -0.16 | -0.16 | -0.31 | 0.24     |
| <b>L-Alanine*</b>                                      | 0.13     | 0.14     | -0.08 | -0.03 | -0.06 | -0.16 | 0.21     |
| <b>beta-Alanine*</b>                                   | 0.08     | 7.95e-03 | -0.15 | 0.04  | 0.03  | 0.02  | -0.01    |
| <b>Sarcosine</b>                                       | 0.03     | -0.01    | -0.10 | -0.10 | -0.06 | -0.01 | -0.06    |
| <b>Cystine</b>                                         | 3.19e-03 | -0.01    | -0.04 | -0.13 | -0.17 | 0.15  | -0.02    |
| <b>L-Serine</b>                                        | 0.09     | 0.08     | -0.08 | 0.06  | 0.11  | 0.07  | -0.21    |
| <b>O-Phosphoethanolamine</b>                           | 3.27e-03 | -0.03    | -0.06 | -0.04 | -0.10 | 0.14  | 3.26e-03 |
| <b>Taurine</b>                                         | -0.06    | -0.03    | 0.13  | 0.08  | 0.07  | 0.07  | -0.09    |

|                          |           |          |           |       |       |           |           |
|--------------------------|-----------|----------|-----------|-------|-------|-----------|-----------|
| <b>L-Asparagine</b>      | 0.15      | 0.21     | -0.02     | -0.05 | -0.05 | 0.01      | -0.10     |
| <b>Hydroxy-L-Proline</b> | 0.22      | 0.18     | -0.18     | 0.03  | 0.08  | -0.16     | 0.11      |
| <b>Glycine</b>           | -3.90e-03 | -0.02    | -7.24e-03 | 0.06  | 0.08  | 0.09      | -0.19     |
| <b>L-Glutamine*</b>      | 0.15      | 0.09     | -0.15     | -0.06 | -0.03 | 0.10      | -0.21     |
| <b>Ethanolamine*</b>     | 0.25      | 0.26     | -0.12     | 0.09  | 0.12  | -0.26     | 0.15      |
| <b>L-Aspartic acid</b>   | 0.06      | 0.13     | 0.04      | -0.05 | -0.05 | -0.23     | 0.20      |
| <b>L-Citruline</b>       | 0.06      | 8.41e-03 | -0.04     | 0.04  | 0.02  | 0.10      | -0.03     |
| <b>L-Threonine</b>       | 0.14      | 0.15     | -0.05     | -0.09 | -0.04 | 0.14      | -0.19     |
| <b>L-Glutamic acid</b>   | 0.22      | 0.14     | -0.13     | -0.17 | -0.19 | -0.22     | 0.30      |
| <b>L-Histidine*</b>      | 3.27e-03  | -0.08    | -0.03     | -0.07 | -0.06 | -0.02     | -4.17e-03 |
| <b>1-Me-L-Histidine</b>  | 0.11      | 0.12     | 0.03      | 0.04  | 0.07  | -0.10     | 0.08      |
| <b>3-Me-L-Histidine</b>  | 0.21      | 0.25     | -0.09     | 0.17  | 0.14  | -9.33e-03 | 0.19      |

|                                       |              |          |           |          |       |           |          |
|---------------------------------------|--------------|----------|-----------|----------|-------|-----------|----------|
| <b>gamma-Amino-butyric acid GABA</b>  | -0.09        | 0.02     | 0.14      | -0.02    | -0.02 | -0.09     | -0.03    |
| <b>D,L-beta-Aminoisobutyric acid</b>  | 0.04         | -0.07    | -0.10     | 0.05     | 0.09  | -0.05     | 2.63e-03 |
| <b>D,L-alpha-Amino-n-butyric acid</b> | -0.04        | -0.04    | 5.81e-03  | 0.08     | 0.13  | -4.66e-03 | -0.03    |
| <b>L-alpha-Aminoadipic acid</b>       | 0.11         | 0.06     | -0.12     | -0.02    | -0.04 | -0.19     | 0.26     |
| <b>L-Proline</b>                      | 0.21         | 0.17     | -0.21     | -0.05    | -0.04 | -0.12     | 0.08     |
| <b>L-Arginine*</b>                    | 0.01         | 5.48e-03 | 0.02      | -0.03    | -0.01 | 0.05      | -0.08    |
| <b>L-Orthithine</b>                   | 0.25         | 0.19     | -0.14     | 0.04     | 0.08  | -0.26     | 0.15     |
| <b>L-Lysine</b>                       | 0.19         | 0.26     | -8.69e-03 | -0.01    | 0.08  | -0.22     | 0.10     |
| <b>L-Valine</b>                       | 0.23         | 0.08     | -0.30     | 5.79e-03 | -0.02 | -0.18     | 0.28     |
| <b>L-Methionine*</b>                  | 0.32 (0.249) | 0.24     | -0.20     | -0.10    | -0.07 | -0.09     | 4.68e-03 |

|                                                                                                                                                                                                                           |         |      |       |       |       |       |      |
|---------------------------------------------------------------------------------------------------------------------------------------------------------------------------------------------------------------------------|---------|------|-------|-------|-------|-------|------|
| <b>L-Tyrosine</b>                                                                                                                                                                                                         | 0.39    | 0.34 | -0.24 | -0.12 | -0.12 | -0.25 | 0.21 |
| <b>L-Isoleucine</b>                                                                                                                                                                                                       | 0.32    | 0.20 | -0.32 | -0.11 | -0.11 | -0.28 | 0.24 |
| <b>L-Leucine</b>                                                                                                                                                                                                          | 0.34    | 0.17 | -0.35 | -0.07 | -0.07 | -0.25 | 0.28 |
| <b>L-Phenylalanine</b>                                                                                                                                                                                                    | 0.44 ** | 0.27 | -0.39 | -0.17 | -0.17 | -0.33 | 0.24 |
| <b>L-Tryptophan</b>                                                                                                                                                                                                       | 0.42 *  | 0.30 | -0.33 | -0.19 | -0.17 | -0.26 | 0.12 |
| ALT: alanine aminotransferase (IU/L), AST: aspartate aminotransferase (IU/L), LDL: Low-density lipoprotein (LDL) cholesterol concentration (mg/dL), HDL: High-density lipoprotein (HDL) cholesterol concentration (mg/dL) |         |      |       |       |       |       |      |

|                                               | Biochemical parameters |                                    |                 |         |            |       |
|-----------------------------------------------|------------------------|------------------------------------|-----------------|---------|------------|-------|
| Amino Acids (AAs)                             | Glucose (mg/dL)        | 120 min-OGTT<br>Glucose<br>(mg/dL) | Insulin (μU/mL) | HOMA-IR | γ-gt (U/L) | NFS   |
| Essential AAs                                 | 0.12                   | 0.04                               | 0.42 *          | 0.47 ** | 0.16       | -0.02 |
| Nonessential AAs                              | 0.12                   | 0.18                               | 0.18            | 0.22    | -0.03      | -0.20 |
| GSG index (glutamate /<br>(serine + glycine)) | -0.01                  | 0.07                               | 0.25            | 0.24    | 0.07       | -0.04 |

|                                              |       |       |          |           |          |       |
|----------------------------------------------|-------|-------|----------|-----------|----------|-------|
| <b>BCAAs (Valine + Leucine + Isoleucine)</b> | 0.20  | 0.04  | 0.48 *** | 0.52 ***  | 0.15     | 0.02  |
| <b>AAAs (Tyrosine + Phenylalanine)</b>       | 0.11  | 0.28  | 0.46 **  | 0.47 **   | 0.10     | -0.09 |
| <b>L-Alanine*</b>                            | 0.03  | 0.20  | 0.24     | 0.23      | -0.02    | -0.25 |
| <b>beta-Alanine*</b>                         | 0.14  | 0.29  | 0.01     | 0.01      | 0.03     | -0.24 |
| <b>Sarcosine</b>                             | 0.16  | 0.03  | -0.16    | -0.05     | 0.09     | -0.09 |
| <b>Cystine</b>                               | 0.11  | -0.18 | 0.26     | 0.29      | 3.40e-03 | 0.12  |
| <b>L-Serine</b>                              | 0.08  | 0.15  | -0.15    | -0.05     | 0.01     | 0.11  |
| <b>O-Phosphoethanolamine</b>                 | -0.06 | -0.06 | -0.05    | -0.12     | 0.20     | -0.04 |
| <b>Taurine</b>                               | -0.10 | -0.08 | -0.01    | -0.08     | -0.11    | -0.05 |
| <b>L-Asparagine</b>                          | 0.07  | 0.08  | -0.07    | -4.56e-03 | 0.10     | 0.07  |
| <b>Hydroxy-L-Proline</b>                     | -0.05 | 0.02  | 0.14     | 0.16      | 0.20     | -0.07 |
| <b>Glycine</b>                               | -0.03 | -0.11 | -0.15    | -0.16     | 1.91e-03 | -0.04 |
| <b>L-Glutamine*</b>                          | 0.10  | 0.18  | -0.05    | 1.79e-03  | 0.02     | -0.04 |
| <b>Ethanolamine*</b>                         | 0.07  | 0.14  | 0.06     | 0.09      | -0.05    | -0.04 |

|                                           |           |       |        |          |       |       |
|-------------------------------------------|-----------|-------|--------|----------|-------|-------|
| <b>L-Aspartic acid</b>                    | -0.06     | 0.10  | -0.04  | 4.66e-03 | -0.04 | -0.12 |
| <b>L-Citruline</b>                        | -0.02     | -0.21 | 0.18   | 0.12     | 0.04  | 0.02  |
| <b>L-Threonine</b>                        | -0.08     | -0.04 | 0.14   | 0.16     | 0.02  | -0.03 |
| <b>L-Glutamic acid</b>                    | 0.04      | 0.10  | 0.25   | 0.25     | 0.11  | -0.04 |
| <b>L-Histidine*</b>                       | 0.02      | 0.12  | 0.05   | 0.11     | -0.16 | -0.08 |
| <b>1-Me-L-Histidine</b>                   | -0.33     | -0.29 | -0.02  | -0.10    | 0.18  | -0.13 |
| <b>3-Me-L-Histidine</b>                   | -8.95e-03 | -0.06 | 0.19   | 0.21     | 0.17  | -0.04 |
| <b>gamma-Amino-butyric acid<br/>GABA</b>  | -0.02     | -0.06 | -0.19  | -0.16    | -0.06 | -0.13 |
| <b>D,L-beta-Aminoisobutyric<br/>acid</b>  | 5.08e-03  | -0.01 | -0.22  | -0.19    | 0.04  | 0.03  |
| <b>D,L-alpha-Amino-n-butyric<br/>acid</b> | 0.05      | -0.19 | -0.18  | -0.12    | 0.08  | 0.07  |
| <b>L-alpha-Aminoadipic acid</b>           | 0.04      | -0.06 | 0.33   | 0.33     | 0.12  | -0.08 |
| <b>L-Proline</b>                          | 0.09      | 0.16  | 0.44 * | 0.43 *   | 0.01  | -0.23 |
| <b>L-Arginine*</b>                        | -0.03     | -0.15 | 0.22   | 0.21     | -0.07 | -0.15 |
| <b>L-Ornithine</b>                        | -0.18     | 0.11  | 0.17   | 0.11     | 0.07  | -0.09 |

|                        |           |       |         |         |           |       |
|------------------------|-----------|-------|---------|---------|-----------|-------|
| <b>L-Lysine</b>        | -1.07e-03 | 0.17  | -0.02   | 0.05    | 0.21      | 0.01  |
| <b>L-Valine</b>        | 0.20      | 0.03  | 0.44 ** | 0.48 ** | 0.12      | 0.03  |
| <b>L-Methionine*</b>   | -0.08     | -0.03 | 0.38 *  | 0.36    | -9.54e-03 | 0.05  |
| <b>L-Tyrosine</b>      | 0.09      | 0.27  | 0.40    | 0.43 *  | 0.08      | -0.02 |
| <b>L-Isoleucine</b>    | 0.19      | 0.09  | 0.42 *  | 0.48 ** | 0.15      | -0.10 |
| <b>L-Leucine</b>       | 0.16      | 0.02  | 0.45 ** | 0.47 ** | 0.16      | 0.01  |
| <b>L-Phenylalanine</b> | 0.08      | 0.20  | 0.47 ** | 0.44 *  | 0.15      | -0.15 |
| <b>L-Tryptophan</b>    | -0.05     | 0.05  | 0.26    | 0.25    | 0.07      | -0.02 |

120 min-OGTT Glucose: Oral Glucose Tolerance Test after 120 min from intake (mg/dL), HOMA-IR: Homeostatic model assessment Insulin Resistance,  $\gamma$ -gt: Gamma Glutamyl Transpeptidase (U/L), NFS: NAFLD fibrosis score

|                          | <b>Anthropometrics</b> |                               |                                 |                               |            |
|--------------------------|------------------------|-------------------------------|---------------------------------|-------------------------------|------------|
| <b>Amino Acids (AAs)</b> | <b>Weight (kg)</b>     | <b>BMI (kg/m<sup>2</sup>)</b> | <b>Waist circumference (cm)</b> | <b>Hip circumference (cm)</b> | <b>WHR</b> |
| <b>Essential AAs</b>     | 0.19                   | -0.03                         | 0.15                            | 0.06                          | 0.16       |
| <b>Nonessential AAs</b>  | -0.12                  | -0.08                         | -0.11                           | -0.02                         | -0.11      |

|                                                    |          |          |          |       |          |
|----------------------------------------------------|----------|----------|----------|-------|----------|
| <b>GSG index ( glutamate / (serine + glycine))</b> | 0.23     | 0.12     | 0.23     | 0.04  | 0.28     |
| <b>BCAAs (Valine + Leucine + Isoleucine)</b>       | 0.27     | 0.05     | 0.23     | 0.09  | 0.24     |
| <b>AAAs (Tyrosine + Phenylalanine)</b>             | 0.12     | -0.08    | 0.10     | -0.02 | 0.18     |
| <b>L-Alanine*</b>                                  | 0.04     | -0.01    | -0.06    | -0.07 | 5.60e-03 |
| <b>beta-Alanine*</b>                               | 0.02     | -0.18    | -0.11    | -0.20 | 0.11     |
| <b>Sarcosine</b>                                   | 0.08     | -0.03    | 0.10     | -0.12 | 0.27     |
| <b>Cystine</b>                                     | 0.07     | 0.22     | 0.32     | 0.25  | 0.12     |
| <b>L-Serine</b>                                    | -0.13    | -0.07    | 3.31e-03 | 0.10  | -0.17    |
| <b>O-Phosphoethanolamine</b>                       | 3.58e-03 | 6.92e-03 | 0.12     | -0.04 | 0.20     |
| <b>Taurine</b>                                     | 0.09     | 0.17     | 0.10     | 0.06  | 0.01     |
| <b>L-Asparagine</b>                                | -0.12    | -0.15    | -0.04    | -0.06 | -0.04    |
| <b>Hydroxy-L-Proline</b>                           | 0.16     | 0.08     | 0.12     | 0.01  | 0.16     |

|                                       |       |           |           |       |          |
|---------------------------------------|-------|-----------|-----------|-------|----------|
| <b>Glycine</b>                        | -0.25 | -0.14     | -0.23     | -0.02 | -0.24    |
| <b>L-Glutamine*</b>                   | -0.08 | -0.09     | -0.17     | -0.06 | -0.15    |
| <b>Ethanolamine*</b>                  | 0.16  | -0.19     | -0.05     | -0.17 | 0.18     |
| <b>L-Aspartic acid</b>                | 0.12  | -3.18e-03 | 0.09      | -0.09 | 0.23     |
| <b>L-Citruline</b>                    | 0.05  | -0.07     | -0.03     | 0.05  | -0.04    |
| <b>L-Threonine</b>                    | -0.06 | -0.06     | 0.04      | 0.10  | -0.07    |
| <b>L-Glutamic acid</b>                | 0.18  | 0.09      | 0.26      | 0.08  | 0.27     |
| <b>L-Histidine*</b>                   | -0.11 | -0.20     | -0.18     | -0.14 | -0.08    |
| <b>1-Me-L-Histidine</b>               | 0.09  | -0.06     | 0.12      | -0.06 | 0.28     |
| <b>3-Me-L-Histidine</b>               | 0.26  | -0.03     | 0.04      | -0.02 | 0.11     |
| <b>gamma-Amino-butyric acid GABA</b>  | 0.05  | 0.03      | 0.14      | 0.06  | 0.11     |
| <b>D,L-beta-Aminoisobutyric acid</b>  | 0.03  | -0.10     | -0.04     | -0.05 | 0.07     |
| <b>D,L-alpha-Amino-n-butyric acid</b> | 0.10  | -0.07     | -8.20e-03 | -0.02 | 2.37e-03 |

|                                 |           |           |          |       |          |
|---------------------------------|-----------|-----------|----------|-------|----------|
| <b>L-alpha-Aminoadipic acid</b> | 0.22      | -1.37e-03 | 0.12     | 0.09  | 0.09     |
| <b>L-Proline</b>                | -4.89e-03 | -0.04     | 3.66e-03 | 0.03  | 0.02     |
| <b>L-Arginine*</b>              | 0.14      | 0.11      | 0.10     | 0.18  | -0.08    |
| <b>L-Orthithine</b>             | -0.03     | -0.12     | -0.09    | -0.16 | 0.11     |
| <b>L-Lysine</b>                 | -0.03     | -0.11     | -0.03    | -0.07 | 8.49e-03 |
| <b>L-Valine</b>                 | 0.25      | 0.10      | 0.21     | 0.10  | 0.17     |
| <b>L-Methionine*</b>            | 0.03      | -0.21     | 9.17e-03 | -0.09 | 0.14     |
| <b>L-Tyrosine</b>               | 0.05      | -0.08     | 0.05     | -0.03 | 0.11     |
| <b>L-Isoleucine</b>             | 0.22      | -0.07     | 0.19     | 0.03  | 0.27     |
| <b>L-Leucine</b>                | 0.27      | 2.91e-03  | 0.22     | 0.05  | 0.32     |
| <b>L-Phenylalanine</b>          | 0.23      | -0.06     | 0.18     | 0.01  | 0.27     |
| <b>L-Tryptophan</b>             | 0.10      | -0.18     | 0.04     | -0.06 | 0.20     |

BMI: Body Mass Index of the participants (kg/m<sup>2</sup>), WHR: Waist to Hip ratio
